# Supplementary material for: Keratinocyte Growth Factor Combined with a Sodium Hyaluronate Gel Inhibits Postoperative Intra-Abdominal Adhesions
Source: MDPI journal article supplement (doi:10.3390/ijms17101611), 2016-09-22
Supplement: s1 [file s1]

# Supplementary Material: KGF Combined with a Sodium Hyaluronate Gel Inhibits Postoperative Intra-Abdominal Adhesions

Guangbing Wei, Cancan Zhou, Guanghui Wang, Lin Fan, Kang Wang and Xuqi Li

**Table S1.** The numerical scoring of the adhesions described by Nair, S.K. et al. [41].

| Grade | Criteria                                                                                                                                                                |
|-------|-------------------------------------------------------------------------------------------------------------------------------------------------------------------------|
| 0     | No adhesion band is present.                                                                                                                                            |
| 1     | A single adhesion band forms between the viscera or between a viscus and the abdominal wall.                                                                            |
| 2     | Two bands form between the viscera or between the viscera and the abdominal wall.                                                                                       |
| 3     | More than two bands form between the viscera or between the viscera and the abdominal wall, or the whole intestine forms a mass without adhering to the abdominal wall. |
| 4     | The viscera have directly adhered to the abdominal wall irrespective of the number of bands.                                                                            |

**Table S2.** The numerical scoring of adhesions described by Leach, R.E. et al. [42].

| Grade | Criteria                                                           |
|-------|--------------------------------------------------------------------|
| 0     | No adhesion band is present.                                       |
| 1     | An avascular band with a filmy thickness is formed.                |
| 2     | A moderately vascularized band(s) with medium thickness is formed. |
| 3     | A well vascularized band(s) with dense thickness is formed.        |

**Table S3.** The numerical scoring of inflammation based on histology.

| Grade | Inflammation                                                                                           |
|-------|--------------------------------------------------------------------------------------------------------|
| 0     | Nil.                                                                                                   |
| 1     | Giant cells, occasional scattered lymphocytes and plasma cells.                                        |
| 2     | Giant cells with increased numbers of admixed lymphocytes, plasma cells, eosinophils, and neutrophils. |
| 3     | Many admixed inflammatory cells; micro abscesses are present.                                          |

**Table S4.** Primers for real-time RT-PCR.

| Genes          | Primer Sequences                                                    |
|----------------|---------------------------------------------------------------------|
| TGF- $\beta$ 1 | P1: 5'-CATTGCTGTCCCGTGCAGA-3'<br>P2: 5'-AGGTAACGCCAGGAATTGTTGCTA-3' |
| Fibrinogen     | P1: 5'-GGCAGATACTACTGGGGTGG-3'<br>P2: 5'-ATGCTTGGGGGACTATTGCTG-3'   |
| $\alpha$ -SMA  | P1: 5'-CCGGGAGAAAATGACTCAAA-3'<br>P2: 5'-GCGTCCAGAGGCATAGAGAG-3'    |
| GAPDH          | P1: 5'-ACCACAGTCCATGCCATCAC-3'<br>P2: 5'-TCCACCACCCTGTTGCTGTA-3'    |
